# Supplementary material
Source: PubMed Central journal article supplement (PMC4135501)
Supplement: 114.085191_ajcn085191SupplementaryData1.pdf [file 114.085191_ajcn085191SupplementaryData1.pdf]

### Online Supplemental Material

**Online supplemental Table 1.** Unadjusted and adjusted<sup>1</sup> mean (95% CI) of hours of weekday/workday duration of nighttime sleep reported by adult Americans, by categories of potential covariates, National Health and Nutrition Examination Surveys, 2005-2010

|                             | All                   |                     |
|-----------------------------|-----------------------|---------------------|
|                             | Unadjusted<br>N=15199 | Adjusted<br>N=14992 |
| All                         | 6.89 (6.85, 6.93)     | 6.88 (6.84, 6.92)   |
| <b>Gender</b>               |                       |                     |
| Men (n=7601)                | 6.82 (6.78, 6.87)     | 6.83 (6.79, 6.88)   |
| Women (n=7598)              | 6.95 (6.90, 7.01)     | 6.93 (6.88, 6.98)   |
| P <sup>2</sup> value        | --                    | 0.004               |
|                             |                       |                     |
| <b>Age, y</b>               |                       |                     |
| 20-39 (n=4950)              | 6.90 (6.84, 6.96)     | 6.89 (6.83, 6.95)   |
| 40-59 (n=5015)              | 6.76 (6.69, 6.82)     | 6.78 (6.71, 6.84)   |
| 60-69 (n=2458)              | 6.99 (6.91, 7.08)     | 6.99 (6.91, 7.08)   |
| ≥70 (n=2776)                | 7.13 (7.11, 7.23)     | 7.11 (7.04, 7.17)   |
| P value                     | ---                   | <0.0001             |
|                             |                       |                     |
| <b>Race/ethnicity</b>       |                       |                     |
| Non-Hispanic white (n=7408) | 6.96 (6.91, 7.01)     | 6.95 (6.90, 7.00)   |
| Non-Hispanic black (n=3089) | 6.45 (6.36-6.53)      | 6.50 (6.41, 6.59)   |
| Mexican-American (n=2740)   | 6.99 (6.91-7.06)      | 6.99 (6.90, 7.07)   |
| Other (n=1962)              | 6.77 (6.68, 6.86)     | 6.76 (6.67, 6.85)   |
| P                           | ---                   | <0.0001             |
|                             |                       |                     |
| <b>Poverty income ratio</b> |                       |                     |
| ≤1.3 (n=4212)               | 6.79 (6.71, 6.88)     | 6.81 (6.72, 6.90)   |
| >1.3-3.5 (n=5434)           | 6.88 (6.82, 6.93)     | 6.88 (6.83, 6.94)   |
| >3.5 (n=4376)               | 6.96 (6.90, 7.01)     | 6.93 (6.88, 6.99)   |
| Unknown (n=1177)            | 6.78 (6.68, 6.88)     | 6.76 (6.67, 6.85)   |
| P value                     | ---                   | <0.01               |
|                             |                       |                     |
| <b>Level of education</b>   |                       |                     |
| <12 y (n=4388)              | 6.88 (6.82, 6.95)     | 6.91 (6.84, 6.99)   |
| 12 y (n=3641)               | 6.82 (6.74, 6.89)     | 6.84 (6.76, 6.91)   |
| Some college (n=4165)       | 6.80 (6.73, 6.86)     | 6.81 (6.74, 6.87)   |
| College (n=2987)            | 7.06 (7.01, 7.12)     | 7.00 (6.94, 7.05)   |
| P value                     | ---                   | <0.0001             |
|                             |                       |                     |
| <b>Employment</b>           |                       |                     |
| Yes (n=8449)                | 6.81 (6.77, 6.86)     | 6.81 (6.76, 6.86)   |

|                                                   |                   |                   |
|---------------------------------------------------|-------------------|-------------------|
| No (n=6748)                                       | 7.02 (6.96, 7.08) | 7.01 (6.94, 7.08) |
| P value                                           | ---               | <0.0001           |
| <b>Smoking status</b>                             |                   |                   |
| Never smoked (n=7992)                             | 6.96 (6.91, 7.02) | 6.95 (6.89, 7.01) |
| Former smoker (n=3835)                            | 6.93 (6.88, 6.98) | 6.90 (6.85, 6.95) |
| Current smoker (n=3368)                           | 6.67 (6.59, 6.75) | 6.72 (6.64, 6.79) |
| P value                                           | ---               | <0.0001           |
| <b>Alcohol drinking status</b>                    |                   |                   |
| Never drinker (n=1898)                            | 7.00 (6.89, 7.10) | 6.90 (6.80, 7.00) |
| Former drinker (n=2125)                           | 6.80 (6.72, 6.89) | 6.82 (6.73, 6.90) |
| Current drinker (n=10130)                         | 6.89 (6.84, 6.94) | 6.90 (6.85, 6.94) |
| Unknown (n=1046)                                  | 6.84 (6.71, 6.97) | 6.83 (6.70, 6.97) |
| P value                                           | ---               | 0.3               |
| <b>Any current self-reported chronic disease?</b> |                   |                   |
| Yes (n=6935)                                      | 6.78 (6.73, 6.83) | 6.74 (6.68, 6.79) |
| No (n=8264)                                       | 6.96 (6.91, 7.01) | 6.98 (6.94, 7.03) |
| P value                                           | ---               | <0.0001           |
| <b>Body mass index (kg/m<sup>2</sup>)</b>         |                   |                   |
| <25 (n=4327)                                      | 7.00 (6.94, 7.07) | 6.96 (6.91, 7.02) |
| 25-<30 (n=5141)                                   | 6.88 (6.83, 6.92) | 6.86 (6.82, 6.91) |
| ≥30 (n=5545)                                      | 6.78 (6.72, 6.84) | 6.83 (6.77, 6.89) |
| P value                                           | ---               | 0.0005            |
| <b>Day of recalled intake</b>                     |                   |                   |
| Monday-Thursday (n=5795)                          | 6.94 (6.88, 7.00) | 6.92 (6.87, 6.98) |
| Friday-Sunday (n=9404)                            | 6.82 (6.78, 6.86) | 6.83 (6.78, 6.88) |
| P value                                           | ---               | 0.008             |
| <b>Month of MEC exam</b>                          |                   |                   |
| Nov. –April (n=6883)                              | 6.90 (6.83, 6.97) | 6.92 (6.85, 6.98) |
| May –Oct (n=8316)                                 | 6.88 (6.83, 6.93) | 6.86 (6.81, 6.91) |
| P value                                           |                   | 0.2               |

<sup>1</sup> Estimated from linear regression models with hours of sleep duration as a continuous dependent variable and all variables in the table as independent variables. Therefore, the values are mean hours of sleep duration associated with a covariate adjusted for all other covariates in the table.

<sup>2</sup>P-value of Wald F global test for differences in hours of sleep duration among categories of each covariate.

**Online Supplemental Table 2.** Adjusted percentage<sup>1</sup> (95% CI) of adult Americans reporting main meals and snacks in a 24-h recall by categories of weekday/workday duration of nighttime sleep, National Health and Nutrition Examination Surveys, 2007-2010

|                                                                                            | Duration of sleep (hours) |                |                 | P <sup>2</sup> - value |
|--------------------------------------------------------------------------------------------|---------------------------|----------------|-----------------|------------------------|
|                                                                                            | ≤6                        | 7-8            | ≥9              |                        |
| Reported breakfast, %                                                                      | 83* (81, 84)              | 86 (84, 87)    | 82* (79, 85)    | 0.005                  |
| Reported lunch, <sup>3</sup> %<br>(men, n=5369)                                            | 77 (75, 79)               | 78 (75, 81)    | 74 (67, 80)     | 0.3                    |
| Reported lunch, <sup>3</sup> %<br>(women, n=5533)                                          | 77* (75, 79)              | 82 (79, 84)    | 77 (72, 82)     | 0.006                  |
| Reported dinner, %                                                                         | 92 (90, 93)               | 93 (92, 94)    | 93 (90, 95)     | 0.3                    |
| Reported all three main meals <sup>4</sup> in the recall, %                                | 59* (57, 61)              | 64 (61, 67)    | 59* (54, 64)    | 0.004                  |
| Reported any snack <sup>5</sup> before breakfast, %<br>(among breakfast reporters, n=8103) | 15* (13, 16)              | 11 (10, 12)    | 12 (9, 16)      | 0.006                  |
| Reported any snack after dinner, % (among dinner reporters, n=8473)                        | 67 (64, 71)               | 64 (62, 66)    | 61 (56, 67)     | 0.1                    |
| Reported ≥50% of 24-h energy from snacks, %                                                | 9.4* (8.4, 10.5)          | 6.9 (5.9, 8.0) | 8.8 (6.6, 11.8) | 0.01                   |
| Percentage with EI/BEE <sup>6</sup> ratio of ≥1.2                                          | 51 (48, 54)               | 54 (52, 56)    | 51 (45, 57)     | 0.06                   |

<sup>1</sup>From logistic regression models with each dietary variable as a dichotomous outcome; independent variables included hours of sleep duration (≤6, 7-8, ≥9), gender (in models for all), race/ethnicity (non-Hispanic white, non-Hispanic Black, Mexican-American, Other), poverty income ratio (<1.3, 1.3-3.5, >3.5, unknown), years of education (<12, 12, some college, college), BMI (<25, 25-30, >30), smoking status (never, former, current smoker), alcohol use status (never, former, current drinker, unknown), day of recall (Monday-Thursday, Friday to Sunday), month of MEC exam (Nov. to April, May to Oct.), chronic disease (yes, no), and employed (yes, no), and physical activity as tertiles of met minutes/week. N=10,902 (except as noted).

<sup>2</sup> P-value of Wald F global test for differences among three categories of hours of sleep duration.

<sup>3</sup>Significant sleep by gender interaction ( $P_{\text{interaction}} = 0.01$ ).

<sup>4</sup> Main meals included eating episodes that were named as breakfast, brunch, lunch, dinner, supper and their Spanish equivalents.

<sup>5</sup> Included all eating episodes that were not main meals as defined above.

<sup>6</sup>Ratio of reported energy intake to calculated energy requirement for basal needs.

\*Significantly different from the reference category of 7-8 hours of sleep ( $P < 0.05$ ).

**Online Supplemental Table 3.** Adjusted mean<sup>1</sup> (95% CI) number of main meal and non-main meal episodes and their relative contribution to 24-hour energy intake reported by adult Americans by categories of weekday/workday duration of nighttime sleep, National Health and Nutrition Examination Surveys, 2007-2010

|                                                                                                   | Duration of sleep (hours) |                      |                       | P <sup>2</sup> - value |
|---------------------------------------------------------------------------------------------------|---------------------------|----------------------|-----------------------|------------------------|
|                                                                                                   | ≤6                        | 7-8                  | ≥9                    |                        |
| Number of all eating episodes, <i>n</i>                                                           | 4.99<br>(4.90, 5.08)      | 5.00<br>(4.92, 5.09) | 4.76*<br>(4.64, 4.88) | 0.001                  |
| Number of main meal <sup>3</sup> episodes, <i>n</i>                                               | 2.74*<br>(2.70, 2.78)     | 2.80<br>(2.77, 2.84) | 2.72*<br>(2.66, 2.78) | 0.004                  |
| Percentage of 24-h energy from main meals                                                         | 76.9*<br>(76.2, 77.5)     | 78.5<br>(77.8, 79.1) | 77.8<br>(76.1, 79.4)  | 0.003                  |
| Number of snack <sup>4</sup> episodes, <i>n</i>                                                   | 2.25<br>(2.16, 2.34)      | 2.20<br>(2.13, 2.27) | 2.04*<br>(1.93, 2.15) | 0.003                  |
| Percentage of 24-h energy from snack episodes                                                     | 23.1*<br>(22.5-23.7)      | 21.5<br>(20.9-22.2)  | 22.2<br>(20.6, 23.8)  | 0.003                  |
| Number of eating episodes reported after dinner by dinner reporters, <i>n</i> (n=5399)            | 1.41*<br>(1.37, 1.46)     | 1.35<br>(1.32, 1.39) | 1.37<br>(1.28, 1.47)  | 0.04                   |
| Percentage of 24-h energy from eating episodes reported after dinner by dinner reporters (n=5399) | 15.5<br>(14.5, 16.4)      | 14.6<br>(14.1, 15.1) | 15.0<br>(12.9, 17.1)  | 0.2                    |
| Percentage of 24-h energy reported ≥ 8 PM                                                         | 16.3<br>(15.2, 17.4)      | 15.2<br>(14.3, 16.1) | 15.9<br>(14.0, 17.7)  | 0.2                    |

<sup>1</sup> From linear regression models with each dietary variable as a continuous outcome; independent variables included hours of sleep duration (≤6, 7-8, ≥9), gender (in models for all), race/ethnicity (non-Hispanic white, non-Hispanic Black, Mexican-American, Other), poverty income ratio (<1.3, 1.3-3.5, >3.5, unknown), years of education (<12, 12, some college, college), BMI (<25, 25-30, >30), smoking status (never, former, current smoker), alcohol use status (never, former, current drinker, unknown), day of recall (Monday-Thursday, Friday to Sunday), month of MEC exam (Nov. to April, May to Oct.), chronic disease (yes, no), and employed (yes, no), and physical activity as tertiles of met minutes/week. N for all =10,902, except as noted.

<sup>2</sup> P-value of Wald F global test for differences among three categories of hours of sleep duration.

<sup>3</sup> Main meals included eating episodes named by the respondent as breakfast, brunch, lunch, dinner, supper and their Spanish equivalents.

<sup>4</sup> All eating episodes that were not main meals (defined above) were considered snacks.

\* Significantly different from the reference category of 7-8 hours of sleep (P <0.05)

**Online Supplemental Table 4.** Adjusted mean<sup>1</sup> intermeal intervals and clock time (95% CI) of meals reported by adult Americans in a 24-h recall by categories of weekday/workday duration of nighttime sleep, National Health and Nutrition Examination Surveys, 2007-2010

|                                                                              | Duration of sleep (hours) |                        |                         | P <sup>2</sup> - value |
|------------------------------------------------------------------------------|---------------------------|------------------------|-------------------------|------------------------|
|                                                                              | ≤6                        | 7-8                    | ≥9                      |                        |
| Length of the eating period, <sup>3</sup> <i>h</i>                           | 12.45*<br>(12.27,12.64)   | 12.15<br>(12.02,12.28) | 11.66*<br>(11.39,11.93) | <0.0001                |
| Average interval between eating episodes, <i>h</i>                           | 2.64*<br>(2.61,2.68)      | 2.57<br>(2.54,2.61)    | 2.58<br>(2.51,2.65)     | 0.006                  |
| Clock time of the first eating episode of the day, <i>HH:MM</i>              | 7:56*<br>(7:45,8:06)      | 8:07<br>(7:57,8:16)    | 8:32*<br>(8:16,8:49)    | 0.0006                 |
| Clock time of the last eating episode of the day, <i>HH:MM</i>               | 20:23*<br>(20:17,20:29)   | 20:15<br>(20:10,20:21) | 20:12<br>(20:02,20:22)  | 0.02                   |
| Clock time of breakfast, <i>HH:MM</i><br>(among breakfast reporters, n=9282) | 8:03*<br>(7:56,8:10)      | 8:10<br>(8:04,8:16)    | 8:30*<br>(8:18,8:42)    | 0.001                  |
| Clock time of lunch, <i>HH:MM</i><br>(among lunch reporters, n=8005)         | 12:37<br>(12:30,12:44)    | 12:43<br>(12:37,12:49) | 12:46<br>(12:36,12:55)  | 0.1                    |
| Clock time of dinner, <i>HH:MM</i><br>(among dinner reporters, n=9740)       | 18:17<br>(18:06,18:28)    | 18:22<br>(18:12,18:32) | 18:22<br>(18:11,18:33)  | 0.4                    |

<sup>1</sup> From linear regression models with each dietary variable as a continuous outcome; independent variables included hours of sleep duration (≤6, 7-8, ≥9), gender (in models for all), race/ethnicity (non-Hispanic white, non-Hispanic Black, Mexican-American, Other), poverty income ratio (<1.3, 1.3-3.5, >3.5, unknown), years of education (<12, 12, some college, college), BMI (<25, 25-30, >30), smoking status (never, former, current smoker), alcohol use status (never, former, current drinker, unknown), day of recall (Monday-Thursday, Friday to Sunday), month of MEC exam (Nov. to April, May to Oct.), chronic disease (yes, no), and employed (yes, no), and physical activity as tertiles of met minutes/week. N for all=10,992, except as noted.

<sup>2</sup>P-value of Wald F global test for differences among three categories of hours of sleep duration.

<sup>3</sup> Interval between the reported times of the first and the last eating episodes in the 24-h recall.

\* Significantly different from the reference category of 7-8 hours of sleep (P <0.05)

**Online Supplemental Table 5.** Adjusted mean<sup>1</sup> (95% CI) of dietary energy and macronutrients reported by adult Americans by categories of weekday/workday duration of nighttime sleep, National Health and Nutrition Examination Surveys, 2007-2010

|                                                                         | Duration of sleep (hours) |                     |                      | P <sup>2</sup> - value |
|-------------------------------------------------------------------------|---------------------------|---------------------|----------------------|------------------------|
|                                                                         | ≤6                        | 7-8                 | ≥9                   |                        |
| Energy, kcal                                                            | 2131<br>(2075,2187)       | 2127<br>(2089,2165) | 2103<br>(1995,2211)  | 0.9                    |
| Percentage of 24-h energy from carbohydrate                             | 50*<br>(49,50)            | 49<br>(49,50)       | 48<br>(47,49)        | 0.03                   |
| Percentage of 24-h energy from protein                                  | 15.7<br>(15.4,15.9)       | 16.0<br>(15.7,16.2) | 15.5*<br>(15.1,15.9) | 0.01                   |
| Percentage of 24-h energy from fat                                      | 33.0<br>(32.6,33.5)       | 33.2<br>(32.9,33.6) | 33.6<br>(32.6,34.6)  | 0.4                    |
| Percentage of 24-h energy from beverages <sup>3,4</sup> (men, n=5369)   | 19.9<br>(18.9,20.8)       | 19.9<br>(19.1,20.7) | 21.5<br>(18.9,24.0)  | 0.4                    |
| Percentage of 24-h energy from beverages <sup>3,4</sup> (women, n=5533) | 19.1*<br>(18.1,20.0)      | 16.8<br>(16.3,17.4) | 18.1<br>(15.9,20.2)  | 0.0001                 |
| Total sugar, g                                                          | 120*<br>(116,124)         | 115<br>(112,119)    | 112<br>(106,118)     | 0.02                   |
| Dietary fiber, g                                                        | 16.4<br>(15.7,17.2)       | 16.7<br>(16.2,17.2) | 15.3*<br>(14.3,16.3) | 0.007                  |
| Alcohol, g                                                              | 10.3<br>(8.7,12.0)        | 10.7<br>(9.6,11.8)  | 13.9<br>(10.6,17.1)  | 0.09                   |
| Caffeine, mg                                                            | 199*<br>(189,214)         | 180<br>(166,194)    | 149*<br>(127,171)    | 0.0001                 |
| EI/BEE <sup>5</sup> ratio                                               | 1.32<br>(1.28,1.35)       | 1.32<br>(1.29,1.34) | 1.29<br>(1.23,1.36)  | 0.8                    |

<sup>1</sup>From linear regression models with each dietary variable as a continuous outcome; independent variables included hours of sleep duration (≤6, 7-8, ≥9), gender (in models for all), race/ethnicity (non-Hispanic white, non-Hispanic Black, Mexican-American, Other), poverty income ratio (<1.3, 1.3-3.5, >3.5, unknown), years of education (<12, 12, some college, college), BMI (<25, 25-30, >30), smoking status (never, former, current smoker), alcohol use status (never, former, current drinker, unknown), day of recall (Monday-Thursday, Friday to Sunday), month of MEC exam (Nov. to April, May to Oct.), chronic disease (yes, no), and employed (yes, no), and physical activity as tertiles of met minutes/week. N=10,902 (except as noted).

<sup>2</sup>P-value of Wald F global test for differences among three categories of hours of sleep duration.

<sup>3</sup>Included all types of beverages: milk, caffeinated and non-caffeinated beverages, energy drinks, alcoholic drinks, fruit and vegetable juices and drinks. Excluded plain tap or bottled water.

<sup>4</sup>Significant sleep by gender interaction ( $P_{\text{interaction}}=0.0001$ ).

<sup>5</sup>Ratio of reported energy intake to calculated energy requirement for basal needs.

\*Significantly different from the reference category of 7-8 hours of sleep ( $P < 0.05$ ).
